# Supplementary material for: Delineation of the DNA Structural Features of Eukaryotic Core Promoter Classes
Source: PubMed Central journal article supplement — ACS Omega. 2022 Feb 9;7(7):5657–69. doi: 10.1021/acsomega.1c04603 (PMC8867553; doi:10.1021/acsomega.1c04603), 2022-02-09
Supplement: ao1c04603_si_001.pdf [file ao1c04603_si_001.pdf]

## Supporting information

# Delineation of the DNA structural features of eukaryotic core promoter classes.

Akkinepally Vanaja<sup>1,2</sup> and Venkata Rajesh Yella<sup>1\*</sup>

<sup>1</sup>Department of Biotechnology, Koneru Lakshmaiah Education Foundation, Vaddeswaram, Guntur 522502, Andhra Pradesh, India

<sup>2</sup>KL College of Pharmacy, Koneru Lakshmaiah Education Foundation, Vaddeswaram, Guntur 522502, Andhra Pradesh, India

\*Corresponding author:

Venkata Rajesh Yella, Department of Biotechnology, Koneru Lakshmaiah Education Foundation, Vaddeswaram, Guntur – 522502, Andhra Pradesh, India, Tel: +91-863-2399999, Extn-1021, Email: yvrajesh\_bt@kluniversity.in, Website: <https://www.kluniversity.in/bt/faculty-list.aspx>

Running title: DNA structural features of eukaryotic promoters

Abbreviations: TSS- Transcription start site, PIC- pre-initiation complex.

Keywords: Eukaryotic promoter, DNA Shape, DNA flexibility, DNA stability, Non-B-DNA.

Conflict of interest: None declared

| Promoter Class        | <i>S. cerevisiae</i> | <i>S. pombe</i> | <i>P. falciparum</i> | <i>C.elegans</i> | <i>Apis mellifera</i> | <i>D.melanogaster</i> | <i>D. rerio</i> | <i>Gallus gallus</i> | <i>C. familiaris</i> | <i>R. norvegicus</i> | <i>M. musculus</i> | <i>M. mulatta</i> | Human | <i>A. thaliana</i> | <i>Zea mays</i> |
|-----------------------|----------------------|-----------------|----------------------|------------------|-----------------------|-----------------------|-----------------|----------------------|----------------------|----------------------|--------------------|-------------------|-------|--------------------|-----------------|
| TATA-only             | 2.44                 | 4.00            | 17.95                | 3.32             | 4.44                  | 3.78                  | 1.69            | 1.17                 | 1.02                 | 1.28                 | 1.43               | 0.79              | 1.12  | 9.57               | 4.43            |
| Inr-only              | 15.84                | 18.66           | 2.38                 | 31.13            | 24.06                 | 28.36                 | 28.93           | 19.60                | 19.95                | 28.09                | 30.25              | 26.05             | 28.19 | 18.38              | 23.36           |
| TCT-only              | 0.12                 | 1.36            | 1.69                 | 2.84             | 0.40                  | 0.51                  | 0.86            | 1.53                 | 1.83                 | 1.58                 | 1.10               | 1.44              | 1.27  | 2.30               | 1.18            |
| BREu-only             | 0.12                 | 0.13            | 0.00                 | 0.63             | 0.33                  | 0.31                  | 0.74            | 8.69                 | 7.30                 | 3.84                 | 3.98               | 5.98              | 5.68  | 0.08               | 2.82            |
| BREd-only             | 15.13                | 17.29           | 31.50                | 10.26            | 13.75                 | 8.04                  | 11.40           | 5.40                 | 6.39                 | 6.13                 | 6.17               | 6.07              | 5.71  | 10.41              | 5.49            |
| XCPE1-only            | 0.04                 | 0.00            | 0.00                 | 0.02             | 0.04                  | 0.01                  | 0.15            | 0.53                 | 0.46                 | 0.43                 | 0.44               | 0.45              | 0.45  | 0.03               | 0.12            |
| DRE-only              | 0.43                 | 0.44            | 0.00                 | 0.44             | 1.72                  | 4.84                  | 0.00            | 0.04                 | 0.06                 | 0.03                 | 0.02               | 0.03              | 0.01  | 0.35               | 0.13            |
| DPE-only              | 0.16                 | 0.13            | 0.02                 | 0.06             | 0.50                  | 0.34                  | 0.35            | 0.30                 | 0.32                 | 0.35                 | 0.25               | 0.37              | 0.37  | 0.09               | 0.16            |
| PB-only               | 0.51                 | 0.29            | 0.00                 | 0.66             | 1.32                  | 1.19                  | 0.69            | 2.27                 | 2.26                 | 1.39                 | 1.26               | 1.82              | 1.49  | 0.59               | 1.48            |
| No Motif Class        | 59.29                | 46.60           | 21.50                | 30.70            | 35.99                 | 25.52                 | 43.55           | 49.90                | 50.07                | 45.94                | 43.95              | 45.67             | 44.27 | 43.39              | 51.29           |
| BREd, BREu            | 0.00                 | 0.04            | 0.00                 | 0.11             | 0.02                  | 0.07                  | 0.09            | 0.30                 | 0.22                 | 0.25                 | 0.20               | 0.35              | 0.32  | 0.03               | 0.12            |
| BREd, BREu, DPE       | 0.00                 | 0.00            | 0.00                 | 0.00             | 0.00                  | 0.00                  | 0.00            | 0.02                 | 0.00                 | 0.00                 | 0.00               | 0.00              | 0.00  | 0.00               | 0.01            |
| BREd, BREu, DPE, Inr  | 0.00                 | 0.00            | 0.00                 | 0.00             | 0.00                  | 0.01                  | 0.00            | 0.00                 | 0.00                 | 0.00                 | 0.00               | 0.00              | 0.00  | 0.00               | 0.00            |
| BREd, BREu, DRE       | 0.00                 | 0.00            | 0.00                 | 0.00             | 0.00                  | 0.02                  | 0.00            | 0.00                 | 0.00                 | 0.00                 | 0.00               | 0.00              | 0.00  | 0.00               | 0.00            |
| BREd, BREu, DRE, Inr  | 0.00                 | 0.00            | 0.00                 | 0.00             | 0.00                  | 0.01                  | 0.00            | 0.00                 | 0.00                 | 0.00                 | 0.00               | 0.00              | 0.00  | 0.00               | 0.00            |
| BREd, BREu, Inr       | 0.02                 | 0.00            | 0.00                 | 0.13             | 0.09                  | 0.04                  | 0.14            | 0.21                 | 0.13                 | 0.14                 | 0.14               | 0.16              | 0.18  | 0.01               | 0.06            |
| BREd, BREu, Inr, PB   | 0.00                 | 0.00            | 0.00                 | 0.00             | 0.00                  | 0.00                  | 0.00            | 0.02                 | 0.00                 | 0.01                 | 0.00               | 0.00              | 0.01  | 0.00               | 0.00            |
| BREd, BREu, Inr, TATA | 0.00                 | 0.00            | 0.00                 | 0.00             | 0.02                  | 0.01                  | 0.00            | 0.00                 | 0.00                 | 0.00                 | 0.00               | 0.01              | 0.01  | 0.00               | 0.00            |
| BREd, BREu, Inr, TCT  | 0.00                 | 0.00            | 0.00                 | 0.02             | 0.00                  | 0.00                  | 0.00            | 0.00                 | 0.02                 | 0.00                 | 0.00               | 0.00              | 0.00  | 0.00               | 0.00            |
| BREd, BREu, PB        | 0.00                 | 0.00            | 0.00                 | 0.00             | 0.00                  | 0.00                  | 0.00            | 0.02                 | 0.06                 | 0.03                 | 0.01               | 0.02              | 0.02  | 0.00               | 0.00            |

|                      |      |      |      |      |      |      |      |      |      |      |      |      |      |      |      |
|----------------------|------|------|------|------|------|------|------|------|------|------|------|------|------|------|------|
| BREd, BREu, PB, TATA | 0.00 | 0.00 | 0.00 | 0.00 | 0.00 | 0.00 | 0.00 | 0.00 | 0.00 | 0.00 | 0.00 | 0.00 | 0.00 | 0.00 | 0.01 |
| BREd, BREu, TATA     | 0.00 | 0.00 | 0.02 | 0.00 | 0.00 | 0.01 | 0.01 | 0.00 | 0.00 | 0.00 | 0.00 | 0.00 | 0.00 | 0.00 | 0.00 |
| BREd, BREu, TCT      | 0.00 | 0.00 | 0.00 | 0.02 | 0.00 | 0.01 | 0.00 | 0.00 | 0.00 | 0.00 | 0.00 | 0.02 | 0.00 | 0.00 | 0.01 |
| BREd, BREu, XCPE1    | 0.00 | 0.00 | 0.00 | 0.00 | 0.00 | 0.00 | 0.00 | 0.00 | 0.00 | 0.00 | 0.00 | 0.01 | 0.01 | 0.00 | 0.00 |
| BREd, DPE            | 0.08 | 0.00 | 0.00 | 0.03 | 0.15 | 0.08 | 0.15 | 0.07 | 0.08 | 0.03 | 0.05 | 0.09 | 0.05 | 0.03 | 0.02 |
| BREd, DPE, DRE       | 0.00 | 0.00 | 0.00 | 0.00 | 0.00 | 0.02 | 0.00 | 0.00 | 0.00 | 0.00 | 0.00 | 0.00 | 0.00 | 0.00 | 0.00 |
| BREd, DPE, Inr       | 0.02 | 0.02 | 0.00 | 0.03 | 0.06 | 0.13 | 0.05 | 0.02 | 0.02 | 0.04 | 0.01 | 0.01 | 0.05 | 0.01 | 0.00 |
| BREd, DPE, Inr, PB   | 0.00 | 0.00 | 0.00 | 0.00 | 0.06 | 0.05 | 0.01 | 0.00 | 0.02 | 0.00 | 0.00 | 0.00 | 0.00 | 0.00 | 0.00 |
| BREd, DPE, Inr, TCT  | 0.00 | 0.00 | 0.00 | 0.02 | 0.00 | 0.00 | 0.00 | 0.00 | 0.00 | 0.00 | 0.00 | 0.00 | 0.00 | 0.00 | 0.00 |
| BREd, DPE, PB        | 0.00 | 0.00 | 0.00 | 0.00 | 0.00 | 0.04 | 0.01 | 0.02 | 0.00 | 0.03 | 0.00 | 0.00 | 0.00 | 0.01 | 0.00 |
| BREd, DPE, TATA      | 0.02 | 0.00 | 0.02 | 0.00 | 0.02 | 0.00 | 0.01 | 0.00 | 0.00 | 0.00 | 0.00 | 0.00 | 0.01 | 0.01 | 0.00 |
| BREd, DPE, TCT       | 0.00 | 0.00 | 0.00 | 0.00 | 0.00 | 0.01 | 0.00 | 0.00 | 0.00 | 0.00 | 0.00 | 0.00 | 0.00 | 0.00 | 0.00 |
| BREd, DPE, XCPE1     | 0.00 | 0.00 | 0.00 | 0.00 | 0.00 | 0.00 | 0.00 | 0.00 | 0.00 | 0.00 | 0.00 | 0.00 | 0.01 | 0.00 | 0.00 |
| BREd, DRE            | 0.12 | 0.13 | 0.00 | 0.24 | 0.70 | 1.52 | 0.00 | 0.00 | 0.00 | 0.02 | 0.00 | 0.00 | 0.01 | 0.08 | 0.01 |
| BREd, DRE, Inr       | 0.04 | 0.08 | 0.00 | 0.22 | 0.28 | 0.78 | 0.00 | 0.00 | 0.00 | 0.01 | 0.00 | 0.00 | 0.00 | 0.02 | 0.01 |
| BREd, DRE, Inr, PB   | 0.00 | 0.00 | 0.00 | 0.00 | 0.00 | 0.01 | 0.00 | 0.00 | 0.00 | 0.00 | 0.00 | 0.00 | 0.00 | 0.00 | 0.00 |
| BREd, DRE, Inr, TATA | 0.00 | 0.00 | 0.00 | 0.00 | 0.04 | 0.01 | 0.00 | 0.00 | 0.00 | 0.00 | 0.00 | 0.00 | 0.00 | 0.00 | 0.00 |
| BREd, DRE, Inr, TCT  | 0.00 | 0.00 | 0.00 | 0.00 | 0.00 | 0.01 | 0.00 | 0.00 | 0.00 | 0.00 | 0.00 | 0.00 | 0.00 | 0.00 | 0.00 |
| BREd, DRE, PB        | 0.00 | 0.00 | 0.00 | 0.00 | 0.00 | 0.03 | 0.00 | 0.00 | 0.00 | 0.00 | 0.00 | 0.00 | 0.00 | 0.00 | 0.00 |
| BREd, DRE, TATA      | 0.00 | 0.02 | 0.00 | 0.00 | 0.02 | 0.03 | 0.00 | 0.00 | 0.00 | 0.00 | 0.00 | 0.00 | 0.00 | 0.01 | 0.00 |
| BREd, DRE, TCT       | 0.00 | 0.02 | 0.00 | 0.00 | 0.02 | 0.02 | 0.00 | 0.00 | 0.00 | 0.00 | 0.00 | 0.00 | 0.00 | 0.00 | 0.00 |
| BREd, Inr            | 3.99 | 6.15 | 4.74 | 8.52 | 7.02 | 9.59 | 6.93 | 2.65 | 2.46 | 3.57 | 4.11 | 3.02 | 3.55 | 4.17 | 1.81 |
| BREd, Inr, PB        | 0.06 | 0.04 | 0.00 | 0.14 | 0.29 | 0.61 | 0.14 | 0.14 | 0.10 | 0.08 | 0.04 | 0.14 | 0.03 | 0.03 | 0.07 |
| BREd, Inr, PB, TATA  | 0.00 | 0.00 | 0.00 | 0.02 | 0.00 | 0.01 | 0.00 | 0.00 | 0.00 | 0.00 | 0.00 | 0.00 | 0.00 | 0.01 | 0.03 |
| BREd, Inr, PB, TCT   | 0.00 | 0.00 | 0.00 | 0.00 | 0.00 | 0.01 | 0.00 | 0.00 | 0.00 | 0.00 | 0.00 | 0.00 | 0.00 | 0.00 | 0.00 |
| BREd, Inr, TATA      | 0.20 | 0.23 | 2.06 | 0.64 | 0.42 | 0.72 | 0.22 | 0.05 | 0.08 | 0.09 | 0.14 | 0.07 | 0.12 | 0.83 | 0.31 |
| BREd, Inr, TATA, TCT | 0.00 | 0.02 | 0.10 | 0.02 | 0.00 | 0.00 | 0.00 | 0.00 | 0.00 | 0.00 | 0.00 | 0.00 | 0.00 | 0.04 | 0.00 |
| BREd, Inr, TCT       | 0.04 | 0.13 | 0.37 | 0.44 | 0.09 | 0.09 | 0.06 | 0.02 | 0.08 | 0.04 | 0.08 | 0.07 | 0.08 | 0.14 | 0.04 |
| BREd, Inr, XCPE1     | 0.00 | 0.00 | 0.00 | 0.00 | 0.00 | 0.00 | 0.01 | 0.00 | 0.00 | 0.01 | 0.00 | 0.03 | 0.02 | 0.00 | 0.00 |
| BREd, PB             | 0.08 | 0.06 | 0.00 | 0.13 | 0.35 | 0.30 | 0.15 | 0.20 | 0.27 | 0.22 | 0.16 | 0.25 | 0.16 | 0.20 | 0.13 |

|                      |      |      |       |      |      |      |      |      |      |      |      |      |      |      |      |
|----------------------|------|------|-------|------|------|------|------|------|------|------|------|------|------|------|------|
| BREd, PB, TATA       | 0.00 | 0.00 | 0.00  | 0.00 | 0.04 | 0.04 | 0.00 | 0.00 | 0.00 | 0.00 | 0.01 | 0.00 | 0.00 | 0.01 | 0.01 |
| BREd, PB, TCT        | 0.00 | 0.00 | 0.00  | 0.00 | 0.02 | 0.00 | 0.00 | 0.00 | 0.00 | 0.00 | 0.00 | 0.01 | 0.01 | 0.00 | 0.00 |
| BREd, PB, XCPE1      | 0.00 | 0.00 | 0.00  | 0.00 | 0.00 | 0.00 | 0.00 | 0.00 | 0.00 | 0.00 | 0.00 | 0.02 | 0.00 | 0.00 | 0.00 |
| BREd, TATA           | 0.43 | 0.98 | 13.21 | 0.90 | 1.32 | 0.88 | 0.17 | 0.11 | 0.24 | 0.10 | 0.16 | 0.09 | 0.09 | 1.98 | 0.53 |
| BREd, TATA, TCT      | 0.00 | 0.00 | 0.57  | 0.02 | 0.02 | 0.00 | 0.01 | 0.00 | 0.02 | 0.02 | 0.01 | 0.02 | 0.01 | 0.04 | 0.01 |
| BREd, TCT            | 0.06 | 0.27 | 1.46  | 0.90 | 0.11 | 0.16 | 0.11 | 0.21 | 0.29 | 0.26 | 0.15 | 0.35 | 0.16 | 0.43 | 0.12 |
| BREd, XCPE1          | 0.04 | 0.00 | 0.00  | 0.00 | 0.07 | 0.01 | 0.03 | 0.11 | 0.03 | 0.09 | 0.06 | 0.02 | 0.07 | 0.03 | 0.00 |
| BREu, DPE            | 0.00 | 0.00 | 0.00  | 0.00 | 0.06 | 0.00 | 0.00 | 0.07 | 0.02 | 0.04 | 0.02 | 0.09 | 0.05 | 0.00 | 0.00 |
| BREu, DPE, DRE, Inr  | 0.00 | 0.00 | 0.00  | 0.00 | 0.00 | 0.01 | 0.00 | 0.00 | 0.00 | 0.00 | 0.00 | 0.00 | 0.00 | 0.00 | 0.00 |
| BREu, DPE, Inr       | 0.00 | 0.00 | 0.00  | 0.00 | 0.00 | 0.02 | 0.00 | 0.02 | 0.03 | 0.03 | 0.01 | 0.03 | 0.02 | 0.00 | 0.00 |
| BREu, DPE, Inr, PB   | 0.00 | 0.00 | 0.00  | 0.00 | 0.02 | 0.00 | 0.00 | 0.00 | 0.00 | 0.01 | 0.01 | 0.00 | 0.00 | 0.00 | 0.00 |
| BREu, DPE, PB        | 0.00 | 0.00 | 0.00  | 0.00 | 0.00 | 0.00 | 0.00 | 0.02 | 0.00 | 0.01 | 0.01 | 0.03 | 0.02 | 0.00 | 0.00 |
| BREu, DPE, PB, XCPE1 | 0.00 | 0.00 | 0.00  | 0.00 | 0.00 | 0.00 | 0.00 | 0.02 | 0.00 | 0.00 | 0.00 | 0.00 | 0.00 | 0.00 | 0.00 |
| BREu, DPE, TCT       | 0.00 | 0.00 | 0.00  | 0.02 | 0.00 | 0.00 | 0.00 | 0.00 | 0.00 | 0.00 | 0.00 | 0.00 | 0.00 | 0.00 | 0.00 |
| BREu, DRE            | 0.00 | 0.00 | 0.00  | 0.02 | 0.04 | 0.04 | 0.00 | 0.00 | 0.00 | 0.00 | 0.00 | 0.00 | 0.00 | 0.00 | 0.00 |
| BREu, DRE, Inr       | 0.00 | 0.00 | 0.00  | 0.00 | 0.00 | 0.02 | 0.00 | 0.00 | 0.00 | 0.00 | 0.00 | 0.00 | 0.00 | 0.00 | 0.00 |
| BREu, DRE, TCT       | 0.00 | 0.00 | 0.00  | 0.00 | 0.00 | 0.01 | 0.00 | 0.00 | 0.00 | 0.00 | 0.00 | 0.00 | 0.00 | 0.00 | 0.00 |
| BREu, Inr            | 0.02 | 0.13 | 0.00  | 0.69 | 0.57 | 0.28 | 0.45 | 3.06 | 2.54 | 2.13 | 2.27 | 3.34 | 3.07 | 0.06 | 1.20 |
| BREu, Inr, PB        | 0.00 | 0.00 | 0.00  | 0.02 | 0.07 | 0.05 | 0.02 | 0.16 | 0.19 | 0.09 | 0.09 | 0.09 | 0.10 | 0.00 | 0.03 |
| BREu, Inr, PB, TATA  | 0.00 | 0.00 | 0.00  | 0.00 | 0.00 | 0.00 | 0.00 | 0.00 | 0.00 | 0.01 | 0.01 | 0.01 | 0.00 | 0.00 | 0.00 |
| BREu, Inr, TATA      | 0.02 | 0.00 | 0.00  | 0.02 | 0.02 | 0.04 | 0.04 | 0.04 | 0.08 | 0.03 | 0.02 | 0.07 | 0.03 | 0.00 | 0.12 |
| BREu, Inr, TCT       | 0.00 | 0.00 | 0.00  | 0.06 | 0.02 | 0.00 | 0.01 | 0.05 | 0.00 | 0.01 | 0.01 | 0.05 | 0.01 | 0.00 | 0.03 |
| BREu, Inr, XCPE1     | 0.00 | 0.00 | 0.00  | 0.00 | 0.00 | 0.00 | 0.00 | 0.00 | 0.00 | 0.00 | 0.00 | 0.02 | 0.01 | 0.00 | 0.00 |
| BREu, PB             | 0.02 | 0.00 | 0.00  | 0.00 | 0.04 | 0.02 | 0.02 | 0.37 | 0.40 | 0.19 | 0.22 | 0.26 | 0.23 | 0.00 | 0.10 |
| BREu, PB, TATA       | 0.00 | 0.00 | 0.00  | 0.00 | 0.00 | 0.01 | 0.00 | 0.00 | 0.00 | 0.00 | 0.00 | 0.00 | 0.00 | 0.00 | 0.00 |
| BREu, PB, TCT        | 0.00 | 0.00 | 0.00  | 0.00 | 0.00 | 0.00 | 0.00 | 0.00 | 0.00 | 0.01 | 0.00 | 0.00 | 0.00 | 0.00 | 0.00 |
| BREu, TATA           | 0.00 | 0.02 | 0.00  | 0.03 | 0.02 | 0.04 | 0.00 | 0.11 | 0.08 | 0.05 | 0.04 | 0.03 | 0.02 | 0.00 | 0.31 |
| BREu, TCT            | 0.00 | 0.00 | 0.00  | 0.05 | 0.00 | 0.02 | 0.00 | 0.20 | 0.16 | 0.09 | 0.08 | 0.09 | 0.10 | 0.00 | 0.08 |
| BREu, XCPE1          | 0.00 | 0.00 | 0.00  | 0.00 | 0.00 | 0.00 | 0.01 | 0.04 | 0.14 | 0.04 | 0.02 | 0.06 | 0.04 | 0.00 | 0.00 |
| DPE, DRE             | 0.00 | 0.00 | 0.00  | 0.00 | 0.04 | 0.02 | 0.00 | 0.00 | 0.00 | 0.00 | 0.00 | 0.00 | 0.00 | 0.00 | 0.00 |

|                    |      |      |      |      |      |      |      |      |      |      |      |      |      |      |      |
|--------------------|------|------|------|------|------|------|------|------|------|------|------|------|------|------|------|
| DPE, DRE, Inr      | 0.00 | 0.00 | 0.00 | 0.00 | 0.04 | 0.03 | 0.00 | 0.00 | 0.00 | 0.00 | 0.00 | 0.00 | 0.00 | 0.00 | 0.00 |
| DPE, DRE, TCT      | 0.00 | 0.00 | 0.00 | 0.00 | 0.00 | 0.01 | 0.00 | 0.00 | 0.00 | 0.00 | 0.00 | 0.00 | 0.00 | 0.00 | 0.00 |
| DPE, Inr           | 0.04 | 0.00 | 0.00 | 0.08 | 0.59 | 0.56 | 0.22 | 0.14 | 0.24 | 0.22 | 0.23 | 0.19 | 0.25 | 0.03 | 0.04 |
| DPE, Inr, PB       | 0.00 | 0.00 | 0.00 | 0.02 | 0.06 | 0.25 | 0.02 | 0.00 | 0.03 | 0.04 | 0.02 | 0.03 | 0.03 | 0.00 | 0.01 |
| DPE, Inr, PB, TATA | 0.00 | 0.00 | 0.00 | 0.00 | 0.00 | 0.01 | 0.00 | 0.00 | 0.00 | 0.00 | 0.00 | 0.00 | 0.00 | 0.00 | 0.01 |
| DPE, Inr, PB, TCT  | 0.00 | 0.00 | 0.00 | 0.00 | 0.00 | 0.01 | 0.00 | 0.00 | 0.00 | 0.00 | 0.00 | 0.00 | 0.00 | 0.00 | 0.00 |
| DPE, Inr, TATA     | 0.00 | 0.00 | 0.00 | 0.00 | 0.02 | 0.02 | 0.00 | 0.02 | 0.00 | 0.02 | 0.01 | 0.01 | 0.02 | 0.01 | 0.00 |
| DPE, Inr, TCT      | 0.00 | 0.00 | 0.00 | 0.00 | 0.00 | 0.00 | 0.00 | 0.00 | 0.00 | 0.00 | 0.00 | 0.01 | 0.01 | 0.00 | 0.00 |
| DPE, PB            | 0.02 | 0.00 | 0.00 | 0.00 | 0.02 | 0.14 | 0.03 | 0.11 | 0.11 | 0.07 | 0.05 | 0.12 | 0.05 | 0.00 | 0.03 |
| DPE, PB, TCT       | 0.00 | 0.00 | 0.00 | 0.00 | 0.00 | 0.01 | 0.00 | 0.00 | 0.00 | 0.00 | 0.00 | 0.00 | 0.00 | 0.00 | 0.00 |
| DPE, TATA          | 0.00 | 0.00 | 0.00 | 0.00 | 0.02 | 0.00 | 0.03 | 0.02 | 0.03 | 0.01 | 0.06 | 0.00 | 0.02 | 0.02 | 0.01 |
| DPE, TCT           | 0.00 | 0.00 | 0.00 | 0.00 | 0.00 | 0.01 | 0.02 | 0.00 | 0.03 | 0.02 | 0.00 | 0.02 | 0.01 | 0.00 | 0.01 |
| DPE, XCPE1         | 0.00 | 0.00 | 0.00 | 0.00 | 0.00 | 0.00 | 0.00 | 0.00 | 0.00 | 0.01 | 0.00 | 0.00 | 0.00 | 0.00 | 0.00 |
| DRE, Inr           | 0.06 | 0.13 | 0.00 | 0.75 | 0.72 | 2.87 | 0.00 | 0.00 | 0.00 | 0.01 | 0.00 | 0.01 | 0.01 | 0.12 | 0.04 |
| DRE, Inr, PB       | 0.00 | 0.00 | 0.00 | 0.00 | 0.02 | 0.09 | 0.00 | 0.00 | 0.00 | 0.00 | 0.00 | 0.00 | 0.00 | 0.00 | 0.01 |
| DRE, Inr, TATA     | 0.00 | 0.00 | 0.00 | 0.00 | 0.00 | 0.04 | 0.00 | 0.00 | 0.00 | 0.00 | 0.00 | 0.00 | 0.00 | 0.03 | 0.01 |
| DRE, Inr, TCT      | 0.00 | 0.00 | 0.00 | 0.13 | 0.04 | 0.01 | 0.00 | 0.00 | 0.00 | 0.00 | 0.00 | 0.00 | 0.01 | 0.00 | 0.01 |
| DRE, PB            | 0.00 | 0.00 | 0.00 | 0.00 | 0.00 | 0.09 | 0.00 | 0.00 | 0.00 | 0.00 | 0.00 | 0.00 | 0.00 | 0.00 | 0.01 |
| DRE, TATA          | 0.00 | 0.08 | 0.00 | 0.00 | 0.17 | 0.13 | 0.00 | 0.00 | 0.00 | 0.00 | 0.00 | 0.00 | 0.00 | 0.07 | 0.00 |
| DRE, TATA, TCT     | 0.00 | 0.00 | 0.00 | 0.00 | 0.02 | 0.00 | 0.00 | 0.00 | 0.00 | 0.00 | 0.00 | 0.00 | 0.00 | 0.00 | 0.00 |
| DRE, TCT           | 0.00 | 0.02 | 0.00 | 0.05 | 0.04 | 0.21 | 0.00 | 0.00 | 0.00 | 0.00 | 0.00 | 0.01 | 0.01 | 0.01 | 0.00 |
| Inr, PB            | 0.06 | 0.08 | 0.00 | 0.66 | 1.52 | 2.19 | 0.50 | 0.71 | 0.56 | 0.72 | 0.62 | 0.68 | 0.72 | 0.15 | 0.62 |
| Inr, PB, TATA      | 0.00 | 0.00 | 0.00 | 0.03 | 0.04 | 0.17 | 0.02 | 0.02 | 0.03 | 0.01 | 0.00 | 0.00 | 0.02 | 0.03 | 0.13 |
| Inr, PB, TATA, TCT | 0.00 | 0.00 | 0.00 | 0.00 | 0.00 | 0.00 | 0.00 | 0.00 | 0.00 | 0.00 | 0.00 | 0.00 | 0.00 | 0.00 | 0.01 |
| Inr, PB, TCT       | 0.00 | 0.00 | 0.00 | 0.08 | 0.02 | 0.01 | 0.00 | 0.00 | 0.02 | 0.02 | 0.00 | 0.00 | 0.01 | 0.00 | 0.00 |
| Inr, PB, XCPE1     | 0.00 | 0.00 | 0.00 | 0.00 | 0.00 | 0.01 | 0.00 | 0.00 | 0.02 | 0.00 | 0.00 | 0.00 | 0.01 | 0.00 | 0.00 |
| Inr, TATA          | 0.41 | 1.77 | 1.66 | 2.29 | 1.78 | 3.64 | 1.23 | 0.75 | 1.02 | 1.45 | 1.35 | 0.59 | 0.96 | 4.63 | 2.61 |
| Inr, TATA, TCT     | 0.00 | 0.04 | 0.02 | 0.14 | 0.04 | 0.01 | 0.04 | 0.04 | 0.02 | 0.01 | 0.01 | 0.01 | 0.01 | 0.16 | 0.03 |
| Inr, TATA, XCPE1   | 0.00 | 0.00 | 0.00 | 0.00 | 0.00 | 0.00 | 0.00 | 0.02 | 0.00 | 0.00 | 0.00 | 0.00 | 0.00 | 0.00 | 0.00 |
| Inr, TCT           | 0.06 | 0.52 | 0.30 | 2.23 | 0.17 | 0.36 | 0.36 | 0.18 | 0.33 | 0.39 | 0.29 | 0.34 | 0.40 | 0.95 | 0.45 |

|                  |      |      |      |      |      |      |      |      |      |      |      |      |      |      |      |
|------------------|------|------|------|------|------|------|------|------|------|------|------|------|------|------|------|
| Inr, XCPE1       | 0.00 | 0.02 | 0.00 | 0.00 | 0.00 | 0.01 | 0.07 | 0.07 | 0.00 | 0.10 | 0.13 | 0.08 | 0.09 | 0.01 | 0.03 |
| PB, TATA         | 0.00 | 0.00 | 0.00 | 0.00 | 0.07 | 0.18 | 0.03 | 0.02 | 0.06 | 0.01 | 0.01 | 0.02 | 0.01 | 0.05 | 0.22 |
| PB, TATA, TCT    | 0.00 | 0.00 | 0.00 | 0.00 | 0.00 | 0.00 | 0.00 | 0.00 | 0.00 | 0.00 | 0.00 | 0.00 | 0.01 | 0.01 | 0.00 |
| PB, TCT          | 0.00 | 0.02 | 0.00 | 0.03 | 0.00 | 0.02 | 0.01 | 0.11 | 0.03 | 0.03 | 0.02 | 0.08 | 0.02 | 0.02 | 0.02 |
| PB, XCPE1        | 0.00 | 0.00 | 0.00 | 0.00 | 0.00 | 0.00 | 0.00 | 0.05 | 0.00 | 0.01 | 0.02 | 0.01 | 0.01 | 0.00 | 0.00 |
| TATA, TCT        | 0.04 | 0.08 | 0.32 | 0.03 | 0.02 | 0.00 | 0.03 | 0.02 | 0.08 | 0.03 | 0.03 | 0.10 | 0.06 | 0.28 | 0.06 |
| TATA, TCT, XCPE1 | 0.00 | 0.00 | 0.00 | 0.00 | 0.00 | 0.00 | 0.00 | 0.00 | 0.00 | 0.01 | 0.00 | 0.00 | 0.00 | 0.00 | 0.00 |
| TATA, XCPE1      | 0.00 | 0.00 | 0.00 | 0.02 | 0.00 | 0.01 | 0.01 | 0.00 | 0.00 | 0.01 | 0.00 | 0.01 | 0.01 | 0.01 | 0.00 |

**Table S1:** Percentage of core promoter regions with consensus sequence motifs. The percentage of promoters with two or more promoter motifs is less when compared to specific motif-only classes.

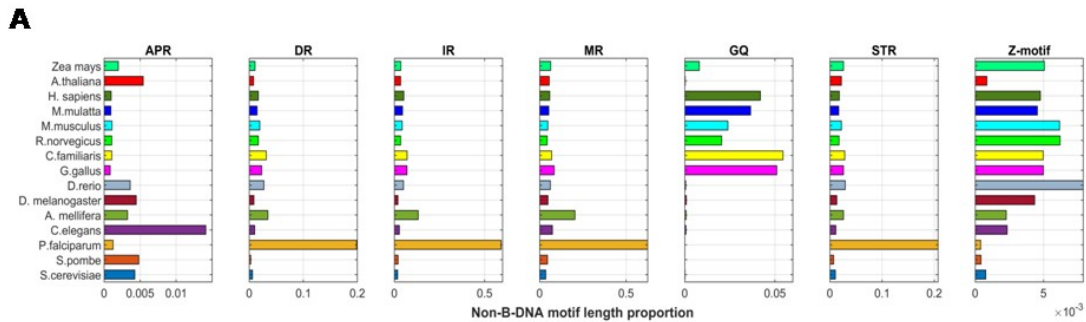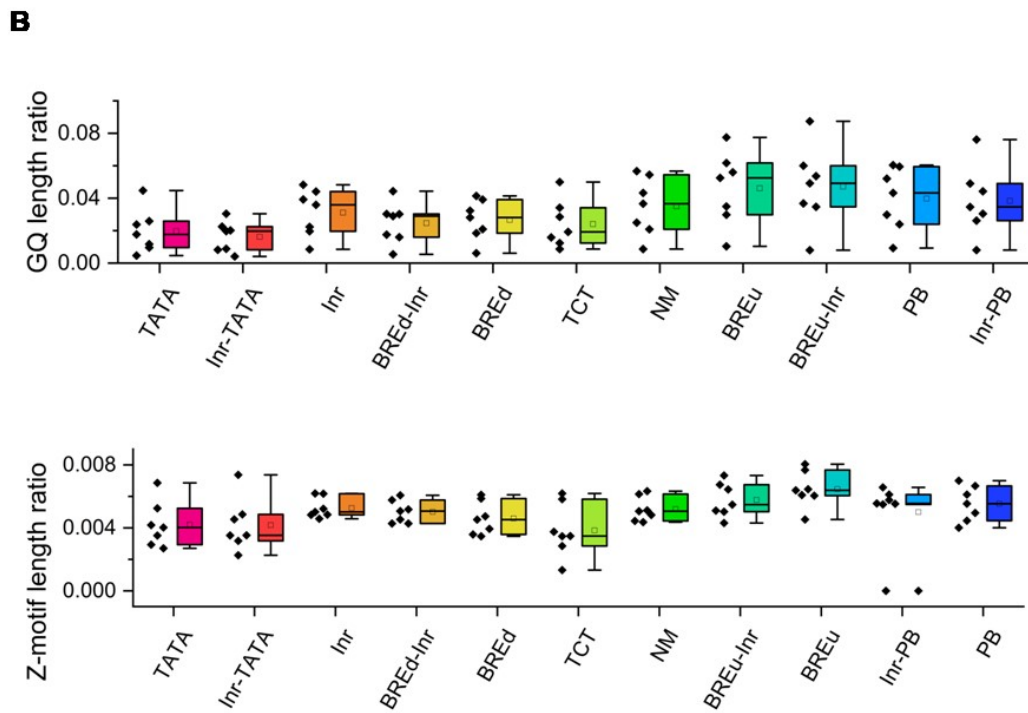

**Figure S1: Non-B-DNA enrichment characteristics of eukaryotic promoter classes.** (A) Comparison of seven non-B-DNA motif length ratios in 15 species. (B) Box plots for comparison of G-quadruplex motifs and Z-DNA motifs for eleven promoter classes. Length ratios of chicken, mammals, and *Zea mays* were displayed for G-quadruplex motifs and Z-DNA motifs, respectively. Code: APR: A-phased repeats, DR: direct repeats, MR: mirror repeats, IR: inverted repeats, GQ: G-quadruplex motifs, and STR: Short tandem repeats.

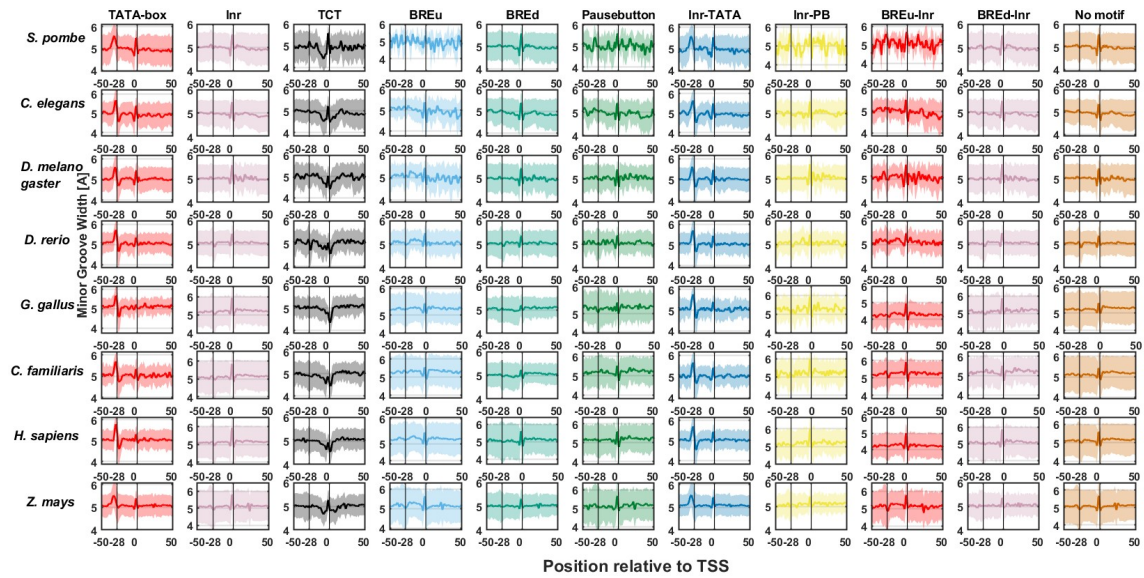

**Figure S2: DNA shape (minor groove width) signals in promoter classes of eukaryotes.** The property minor groove width has been shown for eleven promoter classes, TATA-box, Inr, TCT, BREu, BREd, Pause button(PB), Inr-TATA, Inr-PB, BREu-Inr, BREd-Inr, and No motif for eight eukaryotes.



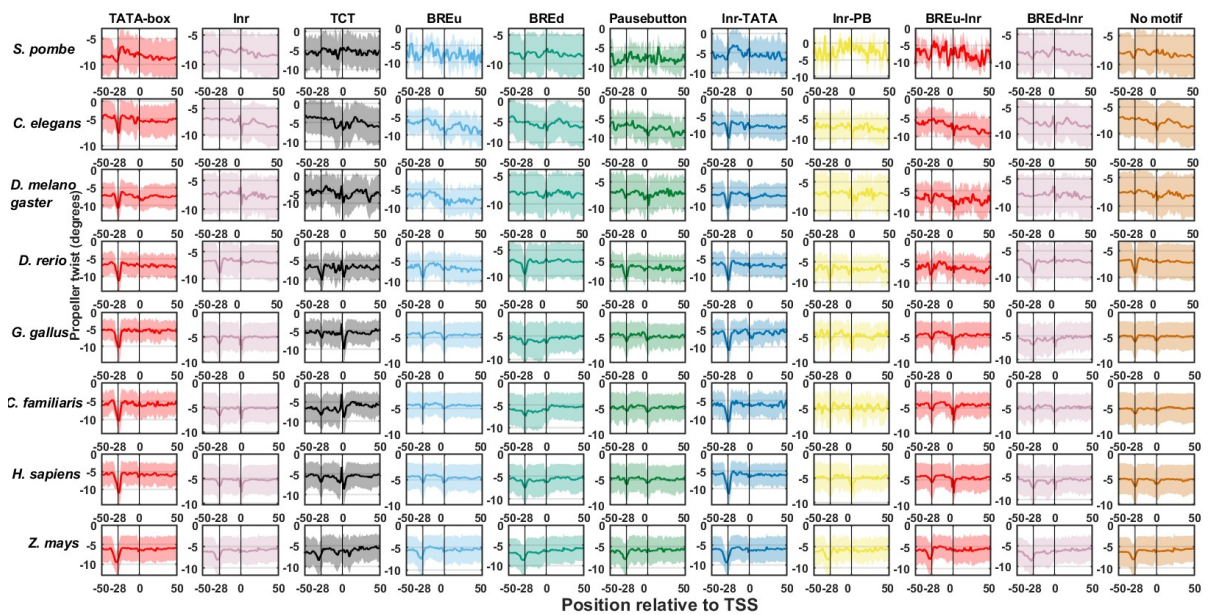

**Figure S3: DNA shape (propeller twist) signals in promoter classes of eukaryotes.** The property propeller twist has been shown for eleven promoter classes, TATA-box, Inr, TCT, BREu, BREd, Pausebutton, Inr-TATA, Inr-PB, BREu-Inr, BREd-Inr and No motif of eight eukaryotes.

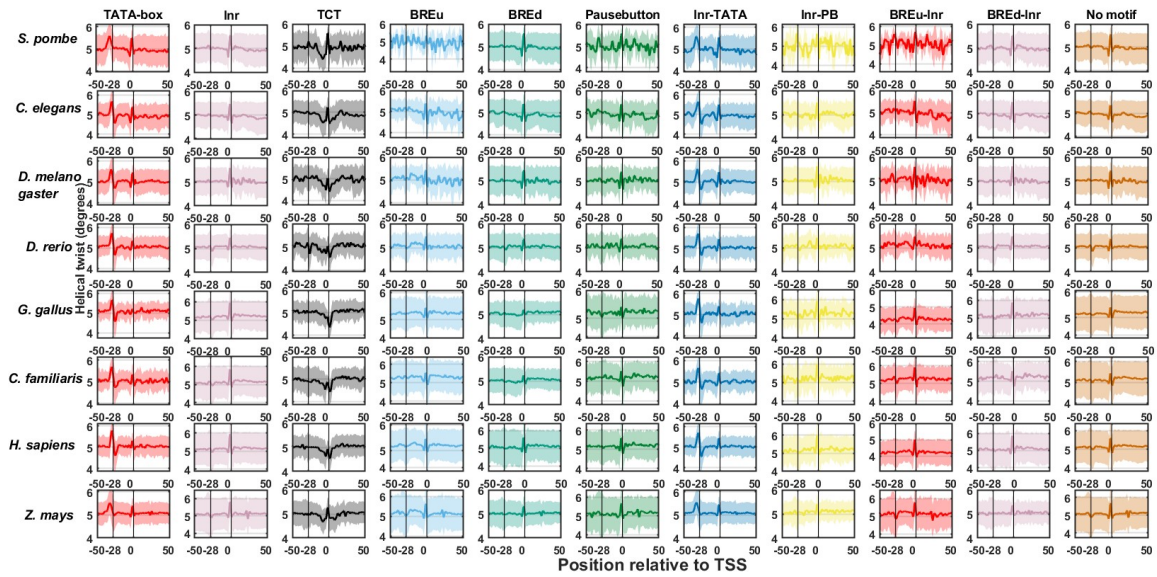

**Figure S4: DNA shape (helical twist) signals in promoter classes of eukaryotes.** The property helical twist has been shown for eleven promoter classes, TATA-box, Inr, TCT, BREu, BREd, Pause button, Inr-TATA, Inr-PB, BREu-Inr, BREd-Inr, and No motif of eight eukaryotes.

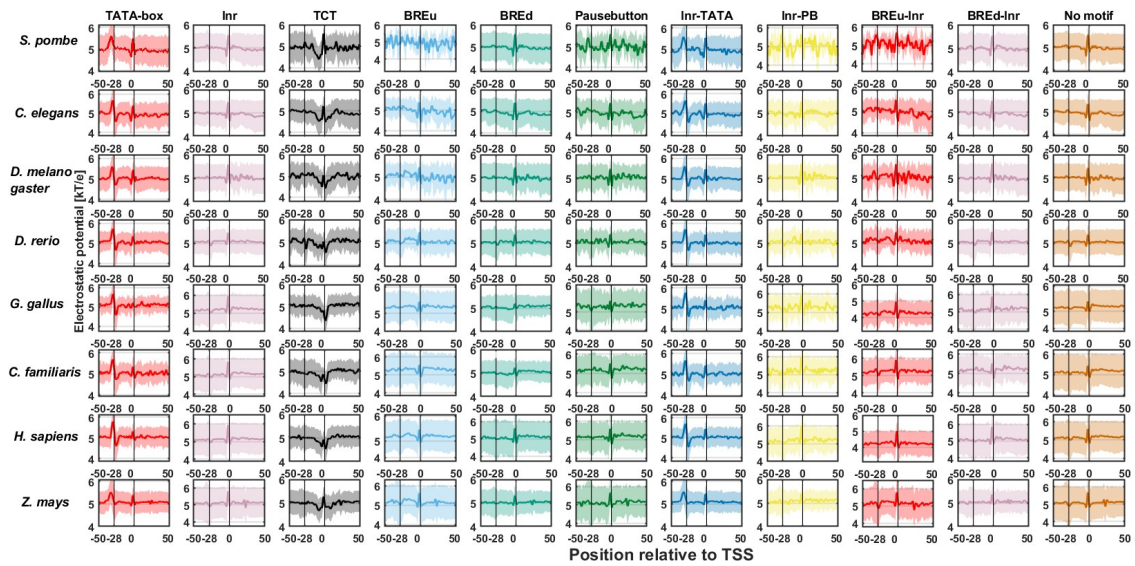

**Figure S5: DNA shape (electrostatic potential) signals in promoter classes of eukaryotes.** The property electrostatic potential has been shown for eleven promoter classes TATA-box, Inr, TCT, BREu, BREd, Pause button, Inr-TATA, Inr-PB, BREu-Inr, BREd-Inr, and No motif of eight eukaryotes.

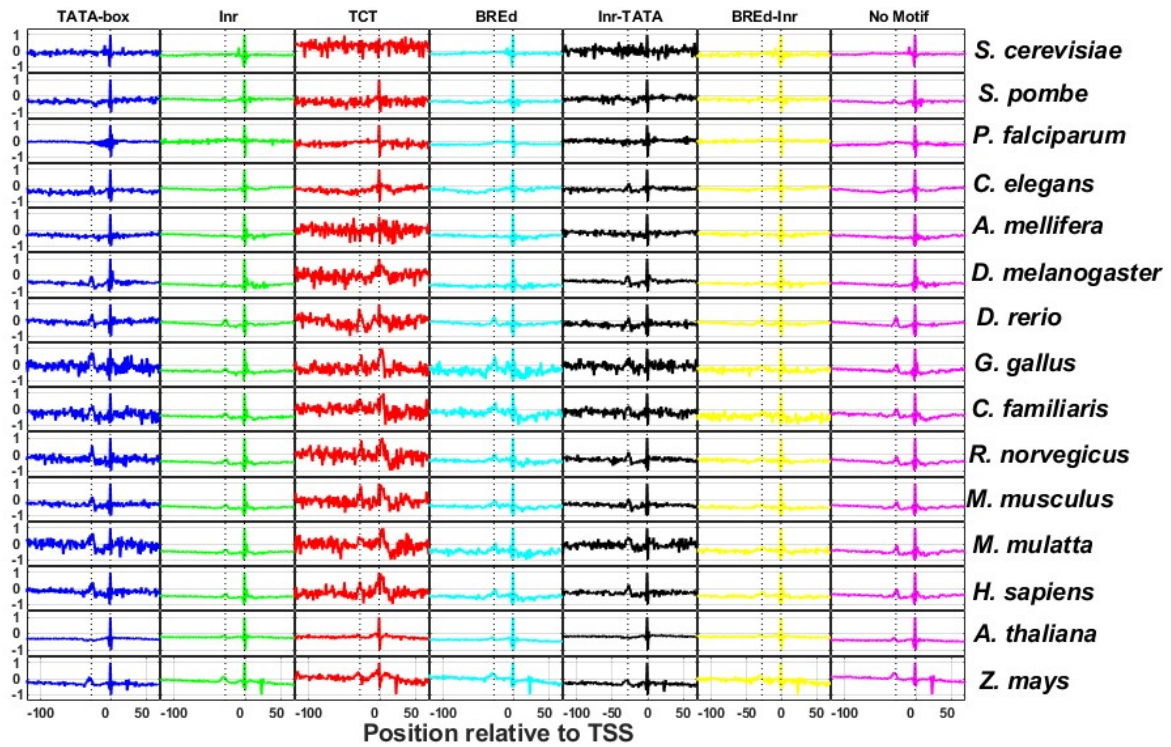

**Figure S6: DNA mechanical stability profiles of TATA-Box, Inr, TCT, BREd, Inr-TATA, BREd-Inr, and no motif classes for 15 species.** The X-axis in all subplots ranges from -100 to +50 with TSS being positioned at “0”. For comparative analysis, the Y-axis has been scaled from -1 to +1.



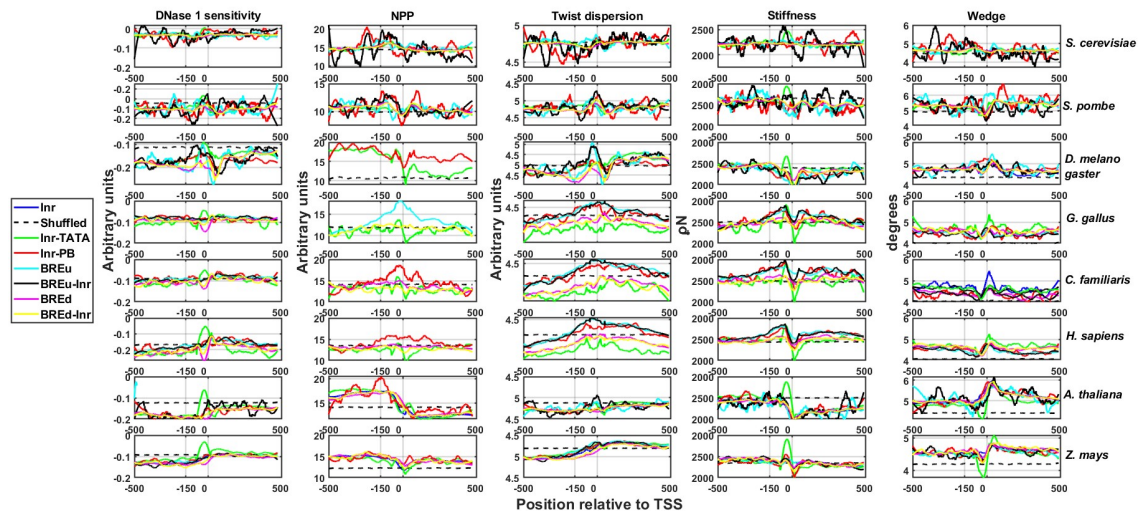

**Figure S7: DNA flexibility profiles of *S. cerevisiae*, *S. pombe*, *D. melanogaster*, *Gallus gallus*, *C. familiaris*, Human, *A. thaliana*, and *Zea mays*.** Different structural properties, bending flexibility (DNase 1 sensitivity and nucleosome positioning preference model), twisting flexibility (twist dispersion model), stretching stiffness, and wedge was calculated for promoter classes, Inr, Shuffled no motif, Inr-TATA, Inr-PB, BREu, BREu-Inr, BREd and BREd-Inr.
